# Supplementary material
Source: publisher figshare collection journal article supplement (https://acs.figshare.com/ndownloader/files/3610707)
Supplement: Supplementary file 1 [file 3610707]

## Sheet: 40 individual samples
		PNNL Dataset Name	Letter Replicate	Number Replicate	Diet	Daf-16 type	Age	Submitted Dataset Name
		c_elegans_A_3_1_21Apr10_Draco_10-03-04	A	1	ff	mut	young	Y-ctrl-FF.1
		c_elegans_A_3_2_21Apr10_Draco_10-03-04	A	1	cr	mut	young	Y-ctrl-DR.1
		c_elegans_A_3_3_21Apr10_Draco_10-03-04	A	1	ff	wt	young	Y-daf2-FF.1
		c_elegans_A_3_4_21Apr10_Draco_10-03-04	A	1	cr	wt	young	Y-daf2-DR.1
		c_elegans_A_3_5_21Apr10_Draco_10-03-04	A	1	ff	mut	old	O-ctrl-FF.1
		c_elegans_A_3_6_21Apr10_Draco_10-03-04	A	1	cr	mut	old	O-ctrl-DR.1
		c_elegans_A_3_7_21Apr10_Draco_10-03-04	A	1	ff	wt	old	O-daf2-FF.1
		c_elegans_A_3_8_21Apr10_Draco_10-03-04	A	1	cr	wt	old	O-daf2-DR.1
		c_elegans_B_2_1_21Apr10_Draco_10-03-05	B	2	ff	mut	young	Y-ctrl-FF.2
		c_elegans_B_2_2_21Apr10_Draco_10-03-05	B	2	cr	mut	young	Y-ctrl-DR.2
		c_elegans_B_2_3_21Apr10_Draco_10-03-05	B	2	ff	wt	young	Y-daf2-FF.2
		c_elegans_B_2_4_21Apr10_Draco_10-03-05	B	2	cr	wt	young	Y-daf2-DR.2
		c_elegans_B_2_5_21Apr10_Draco_10-03-05	B	2	ff	mut	old	O-ctrl-FF.2
		c_elegans_B_2_6_21Apr10_Draco_10-03-05	B	2	cr	mut	old	O-ctrl-DR.2
		c_elegans_B_2_7_21Apr10_Draco_10-03-05	B	2	ff	wt	old	O-daf2-FF.2
		c_elegans_B_2_8_21Apr10_Draco_10-03-05	B	2	cr	wt	old	O-daf2-DR.2
		c_elegans_C_1_1_21Apr10_Draco_10-03-06	C	3	ff	mut	young	Y-ctrl-FF.3
		c_elegans_C_1_2_21Apr10_Draco_10-03-06	C	3	cr	mut	young	Y-ctrl-DR.3
		c_elegans_C_1_3_21Apr10_Draco_10-03-06	C	3	ff	wt	young	Y-daf2-FF.3
		c_elegans_C_1_4_21Apr10_Draco_10-03-06	C	3	cr	wt	young	Y-daf2-DR.3
		c_elegans_C_1_5_21Apr10_Draco_10-03-06	C	3	ff	mut	old	O-ctrl-FF.3
		c_elegans_C_1_6_21Apr10_Draco_10-03-06	C	3	cr	mut	old	O-ctrl-DR.3
		c_elegans_C_1_7_21Apr10_Draco_10-03-06	C	3	ff	wt	old	O-daf2-FF.3
		c_elegans_C_1_8_21Apr10_Draco_10-03-06	C	3	cr	wt	old	O-daf2-DR.3
		c_elegans_D_1_1_21Apr10_Draco_10-03-07	D	4	ff	mut	young	Y-ctrl-FF.4
		c_elegans_D_1_2_21Apr10_Draco_10-03-07	D	4	cr	mut	young	Y-ctrl-DR.4
		c_elegans_D_1_3_21Apr10_Draco_10-03-07	D	4	ff	wt	young	Y-daf2-FF.4
		c_elegans_D_1_4_21Apr10_Draco_10-03-07	D	4	cr	wt	young	Y-daf2-DR.4
		c_elegans_D_1_5_21Apr10_Draco_10-03-07	D	4	ff	mut	old	O-ctrl-FF.4
		c_elegans_D_1_6_21Apr10_Draco_10-03-07	D	4	cr	mut	old	O-ctrl-DR.4
		c_elegans_D_1_7_21Apr10_Draco_10-03-07	D	4	ff	wt	old	O-daf2-FF.4
		c_elegans_D_1_8_21Apr10_Draco_10-03-07	D	4	cr	wt	old	O-daf2-DR.4
		c_elegans_E_3_1_21Apr10_Draco_10-03-04	E	5	ff	mut	young	Y-ctrl-FF.5
		c_elegans_E_3_2_21Apr10_Draco_10-03-04	E	5	cr	mut	young	Y-ctrl-DR.5
		c_elegans_E_3_3_21Apr10_Draco_10-03-04	E	5	ff	wt	young	Y-daf2-FF.5
		c_elegans_E_3_4_21Apr10_Draco_10-03-04	E	5	cr	wt	young	Y-daf2-DR.5
		c_elegans_E_3_5_21Apr10_Draco_10-03-04	E	5	ff	mut	old	O-ctrl-FF.5
		c_elegans_E_3_6_21Apr10_Draco_10-03-04	E	5	cr	mut	old	O-ctrl-DR.5
		c_elegans_E_3_7_21Apr10_Draco_10-03-04	E	5	ff	wt	old	O-daf2-FF.5
		c_elegans_E_3_8_21Apr10_Draco_10-03-04	E	5	cr	wt	old	O-daf2-DR.5

## Sheet: 24 SCX fractions
		Datasets used to build AMT tag database containing masses and elution time of peptides observed in C.elegans.
		All 8 conditions from replicate B were mixed together prior SCX fractionation.
	c_elegans_B_1_01_21Apr10_Draco_10-03-05
	c_elegans_B_1_02_21Apr10_Draco_10-03-05
	c_elegans_B_1_03_21Apr10_Draco_10-03-05
	c_elegans_B_1_04_21Apr10_Draco_10-03-05
	c_elegans_B_1_05_21Apr10_Draco_10-03-05
	c_elegans_B_1_06_21Apr10_Draco_10-03-05
	c_elegans_B_1_07_21Apr10_Draco_10-03-05
	c_elegans_B_1_08_21Apr10_Draco_10-03-05
	c_elegans_B_1_09_21Apr10_Draco_10-03-06
	c_elegans_B_1_10_21Apr10_Draco_10-03-06
	c_elegans_B_1_11_21Apr10_Draco_10-03-06
	c_elegans_B_1_12_21Apr10_Draco_10-03-06
	c_elegans_B_1_13_21Apr10_Draco_10-03-06
	c_elegans_B_1_14_21Apr10_Draco_10-03-06
	c_elegans_B_1_15_21Apr10_Draco_10-03-06
	c_elegans_B_1_16_21Apr10_Draco_10-03-06
	c_elegans_B_1_17_21Apr10_Draco_10-03-07
	c_elegans_B_1_18_21Apr10_Draco_10-03-07
	c_elegans_B_1_19_21Apr10_Draco_10-03-07
	c_elegans_B_1_20_21Apr10_Draco_10-03-07
	c_elegans_B_1_21_21Apr10_Draco_10-03-07
	c_elegans_B_1_22_21Apr10_Draco_10-03-07
	c_elegans_B_1_23_21Apr10_Draco_10-03-07
	c_elegans_B_1_24_21Apr10_Draco_10-03-07

## Sheet: corresponding SEQUEST job ids
					SEQUEST Par file: sequest_N14_Tryp_StatAlkCys_ParTol0pt2_FragTol1pt0.params
		AnalysisID	DatasetName		DATABASE: C_elegans_v210_2010-01-15,Keratin_Species_2006-08-11,Pig_Trypsin_Species_2006-08-11
		587984	c_elegans_A_3_1_21Apr10_Draco_10-03-04
		587980	c_elegans_A_3_2_21Apr10_Draco_10-03-04
		587958	c_elegans_A_3_3_21Apr10_Draco_10-03-04
		587976	c_elegans_A_3_4_21Apr10_Draco_10-03-04
		587967	c_elegans_A_3_5_21Apr10_Draco_10-03-04
		587961	c_elegans_A_3_6_21Apr10_Draco_10-03-04
		587972	c_elegans_A_3_7_21Apr10_Draco_10-03-04
		587956	c_elegans_A_3_8_21Apr10_Draco_10-03-04
		587989	c_elegans_B_1_01_21Apr10_Draco_10-03-05
		587993	c_elegans_B_1_02_21Apr10_Draco_10-03-05
		587997	c_elegans_B_1_03_21Apr10_Draco_10-03-05
		588001	c_elegans_B_1_04_21Apr10_Draco_10-03-05
		588005	c_elegans_B_1_05_21Apr10_Draco_10-03-05
		588009	c_elegans_B_1_06_21Apr10_Draco_10-03-05
		588013	c_elegans_B_1_07_21Apr10_Draco_10-03-05
		588017	c_elegans_B_1_08_21Apr10_Draco_10-03-05
		587990	c_elegans_B_1_09_21Apr10_Draco_10-03-06
		587994	c_elegans_B_1_10_21Apr10_Draco_10-03-06
		587998	c_elegans_B_1_11_21Apr10_Draco_10-03-06
		588002	c_elegans_B_1_12_21Apr10_Draco_10-03-06
		588006	c_elegans_B_1_13_21Apr10_Draco_10-03-06
		588010	c_elegans_B_1_14_21Apr10_Draco_10-03-06
		588014	c_elegans_B_1_15_21Apr10_Draco_10-03-06
		588018	c_elegans_B_1_16_21Apr10_Draco_10-03-06
		587991	c_elegans_B_1_17_21Apr10_Draco_10-03-07
		587995	c_elegans_B_1_18_21Apr10_Draco_10-03-07
		587999	c_elegans_B_1_19_21Apr10_Draco_10-03-07
		588003	c_elegans_B_1_20_21Apr10_Draco_10-03-07
		588007	c_elegans_B_1_21_21Apr10_Draco_10-03-07
		588011	c_elegans_B_1_22_21Apr10_Draco_10-03-07
		588015	c_elegans_B_1_23_21Apr10_Draco_10-03-07
		588019	c_elegans_B_1_24_21Apr10_Draco_10-03-07
		587960	c_elegans_B_2_1_21Apr10_Draco_10-03-05
		587981	c_elegans_B_2_2_21Apr10_Draco_10-03-05
		587969	c_elegans_B_2_3_21Apr10_Draco_10-03-05
		587957	c_elegans_B_2_4_21Apr10_Draco_10-03-05
		587959	c_elegans_B_2_5_21Apr10_Draco_10-03-05
		587973	c_elegans_B_2_6_21Apr10_Draco_10-03-05
		587977	c_elegans_B_2_7_21Apr10_Draco_10-03-05
		587985	c_elegans_B_2_8_21Apr10_Draco_10-03-05
		587962	c_elegans_C_1_1_21Apr10_Draco_10-03-06
		587982	c_elegans_C_1_2_21Apr10_Draco_10-03-06
		587964	c_elegans_C_1_3_21Apr10_Draco_10-03-06
		587974	c_elegans_C_1_4_21Apr10_Draco_10-03-06
		587966	c_elegans_C_1_5_21Apr10_Draco_10-03-06
		587986	c_elegans_C_1_6_21Apr10_Draco_10-03-06
		587978	c_elegans_C_1_7_21Apr10_Draco_10-03-06
		587970	c_elegans_C_1_8_21Apr10_Draco_10-03-06
		587971	c_elegans_D_1_1_21Apr10_Draco_10-03-07
		587983	c_elegans_D_1_2_21Apr10_Draco_10-03-07
		587987	c_elegans_D_1_3_21Apr10_Draco_10-03-07
		587963	c_elegans_D_1_4_21Apr10_Draco_10-03-07
		587979	c_elegans_D_1_5_21Apr10_Draco_10-03-07
		587975	c_elegans_D_1_6_21Apr10_Draco_10-03-07
		587965	c_elegans_D_1_7_21Apr10_Draco_10-03-07
		587968	c_elegans_D_1_8_21Apr10_Draco_10-03-07
		588000	c_elegans_E_3_1_21Apr10_Draco_10-03-04
		587992	c_elegans_E_3_2_21Apr10_Draco_10-03-04
		588012	c_elegans_E_3_3_21Apr10_Draco_10-03-04
		588004	c_elegans_E_3_4_21Apr10_Draco_10-03-04
		588008	c_elegans_E_3_5_21Apr10_Draco_10-03-04
		587988	c_elegans_E_3_6_21Apr10_Draco_10-03-04
		587996	c_elegans_E_3_7_21Apr10_Draco_10-03-04
		588016	c_elegans_E_3_8_21Apr10_Draco_10-03-04
